# Supplementary material
Source: publisher site journal article supplement (https://www.dovepress.com/article/219224)
Supplement: Supplementary file 1 [file get_supplementary_file.php]

**Supplemental materials**

**S.1. Method**

**S.1. 1Characterization of CD-Cur**

**S.1.1.1. Curcumin content determination in CD-Cur**

Curcumin concentration was measured by a UV-Vis spectrophotometer (Orion™ AquaMate 8000) at 425 nm. In brief , a standard curve of curcumin in DMSO (0–10 μg/mL) was made under identical conditions. Subsequently, 22mg of CD-Cur was dissolved in 50 mL dimethylsulfoxide (DMSO) by gently shaking for 24h at 37℃ protected from light . Centrifuged at 14,000 rpm for 3 min, the resulted curcumin containing DMSO supernatant was then collected and its absorbance were measured at 425 nm.

**S.1.1.2. SEM**

The surface morphology of CD, Cur and CD-Cur was studied using scanning electron microscope (FEI Quanta 200, Holland) at an accelerating voltage of 30 kV. Dry samples were placed on double sided carbon tape, gold-sputtered and then mounted on SEM stage before scanning.

**S.1.1.3. FTIR**

Fourier transform infrared (FTIR) spectra of CD, Cur and CD-Cur inclusion complexes were recorded on a FT-IR microscope(Danbury, CT, USA) . The scanning range used was 450-4000 cm−1 at a scanning speed of 4 cm−1 and 32 scans. The average of 32 scans data was presented as FTIR spectra.

**S.1.1.4. X-ray diffraction measurements**

X-ray diffraction measurements of CD, CUR and CD-CUR inclusion complexes were conducted using a D/Max-B Rikagu diffractometer (Rigaku Americas Corp, Woodlands, TX). Samples were mounted on double sided silicone tape and then measured with technical parameters setted as: voltage, 40 kV; electric current, 40 mA; scan speed of 4◦ per minute; scan range, 20℃to 80℃.

**S.2. Optimal curcumin concentration determination of CA-CD-Cur when applied topically on cutaneous wound of rat**

Based on former pubilished paper and our preliminary experiment, 5 gradient concentration of CA-CD-Cur were adopted in this part of experiment: CA-CD-Cur 1(containing 6.25mg of Cur in 6 sponges made from one 6-well plate), CA-CD-Cur 2(12.5 mg), CA-CD-Cur 3(25mg), CA-CD-Cur 4(50mg) and CA-CD-Cur 5(75mg) .36 rats were randomly divided into 6 groups (6 rats per group): Gauze, CA-CD-Cur 1, CA-CD-Cur 2, CA-CD-Cur 3, CA-CD-Cur 4 and CA-CD-Cur 5. Animals were anesthetized by ketamine hydrochloride (60 mg/kg body weight). Dorsal hair was removed and then disinfected with 70% ethanol. Full-thickness cutaneous wounds of 2cm＋2cm were made on the back of the rats using scalpel to the depth of loose subcutaneous tissues. Each wound was covered with equal size of Gauze, CA-CD-Cur 1, CA-CD-Cur 2, CA-CD-Cur 3, CA-CD-Cur 4 and CA-CD-Cur 5, respectively. Wound appearance was carefully The optimal curcumin concentration is obtained by evaluating the Wound closure rate and wound appearance.

**S.2. Results**

**S.2.1. Physicochemical profile of CD-Cur**

CD-Cur was succesfully prepared. 647mg of CD and 147mg of Cur yield 421.36mg of CD-Cur. Based on the absorbtion value at 425nm of standard samples, a standard curve was achieved (Figure not shown). As a result, 1mg of CD-Cur contained 166.80±12.16μg curcumin. According to this data, the amount of CD-Cur that contains 6.25mg, 12.5mg, 25mg, 50mg and 75mg of curcumin was 37.47mg, 74.94mg, 149.88mg, 299.77mg and 449.65mg, respectively (these data were adopted in the following sponge making process). As shown in Fig.S.1.F, in 6 ml water, 149.88mg of CD-Cur (containing 25 mg of curcumin) could be fully dissolved without obvious sediment. In contrast, 25 mg of Cur alone could not be completely dissolved. Considerable yellow powder(indicated by purple arrow head) could be seen lying in on the bottom of the glass vial.

The surface morphology of CD, Cur and CD-Cur was studied by SEM as shown in Fig.S.1.A-C, CD shows spherical-like structures with numerous interior cavities (Fig.S.1.A) while Cur exhibited rod-like structures (Fig.S.1.B.). After the dissolution, stirring and freeze-drying process during which CD and Cur was formulated into CD-Cur, their micro-structures transformed into plate-like(CD) and microspheric-like forms(Cur), respectively[1, 2]. In contrast, CD-Cur showed an aggregation of flakes and and microspheres in clusters ( Fig.S.1.C). This morphological transformation indicated the formation of CD-Cur inclusion complex with curcumin encapsulated in the cavities of CD[2].

FTIR spectroscopy was used to justify the formation of the CD-Cur inclusion complex. As shown in Fig.S.1.D. The spectrum of curcumin presented its an characteristic absorption peak at 3420 cm−1 (attributed to the phenolic O-H stretching vibrations); 1627 cm−1 (mixed character of C=C and C=O), 1587 cm−1(symmetric aromatic of C=C ring), 1512−1 (C=O), 1283cm−1 (aromatic C–O), 1031cm−1 (C–O–C), 962 cm−1 (benzoate tans-CH) and 715 cm−1 (cis-CH) . On the other hand, spectra of CD (red line spectrum) showed characteristic bands at 3413 cm −1 and 2928 cm−1 due to the stretching vibrations of O–H and C–H. Besides, peaks at 1635 cm −1, 1154cm−1, 1034 cm−1, and 854 cm−1 were attributed to H-O-H, C–O, C–O–C glucose units and C–O–C of rings of CD, respectively. In the case of CD-Cur inclusion complex spectrum (purple line spectrum), most of the characteristic sharp peaks correspond to CD could be seen. However, only few characteristic peaks of Cur were visible. As a result of Cur complexation with CD, the CD-related peaks were slightly shifted，i.e., 3418–3413 cm −1 ; 2928-2926cm−1 ; 1635–1631 cm−1 ; 1034–1031 cm−1, etc. These details indicated that Cur was successfully included by CD[2].

X-ray diffraction spectra of CD, Cur and CD-Cur inclusion complexes were presented in Fig.S.1.E. Curcumin has displayed the characteristic crystalline peaks. Few crystalline peaks could also be seen in CD spectra. However, the CD-Cur spectrum was lack of a well defined crystalline peak, suggesting the formation of inclusion complex with amorphous form. This results was consistent with previous reports of CD inclusion complexes[1, 2].


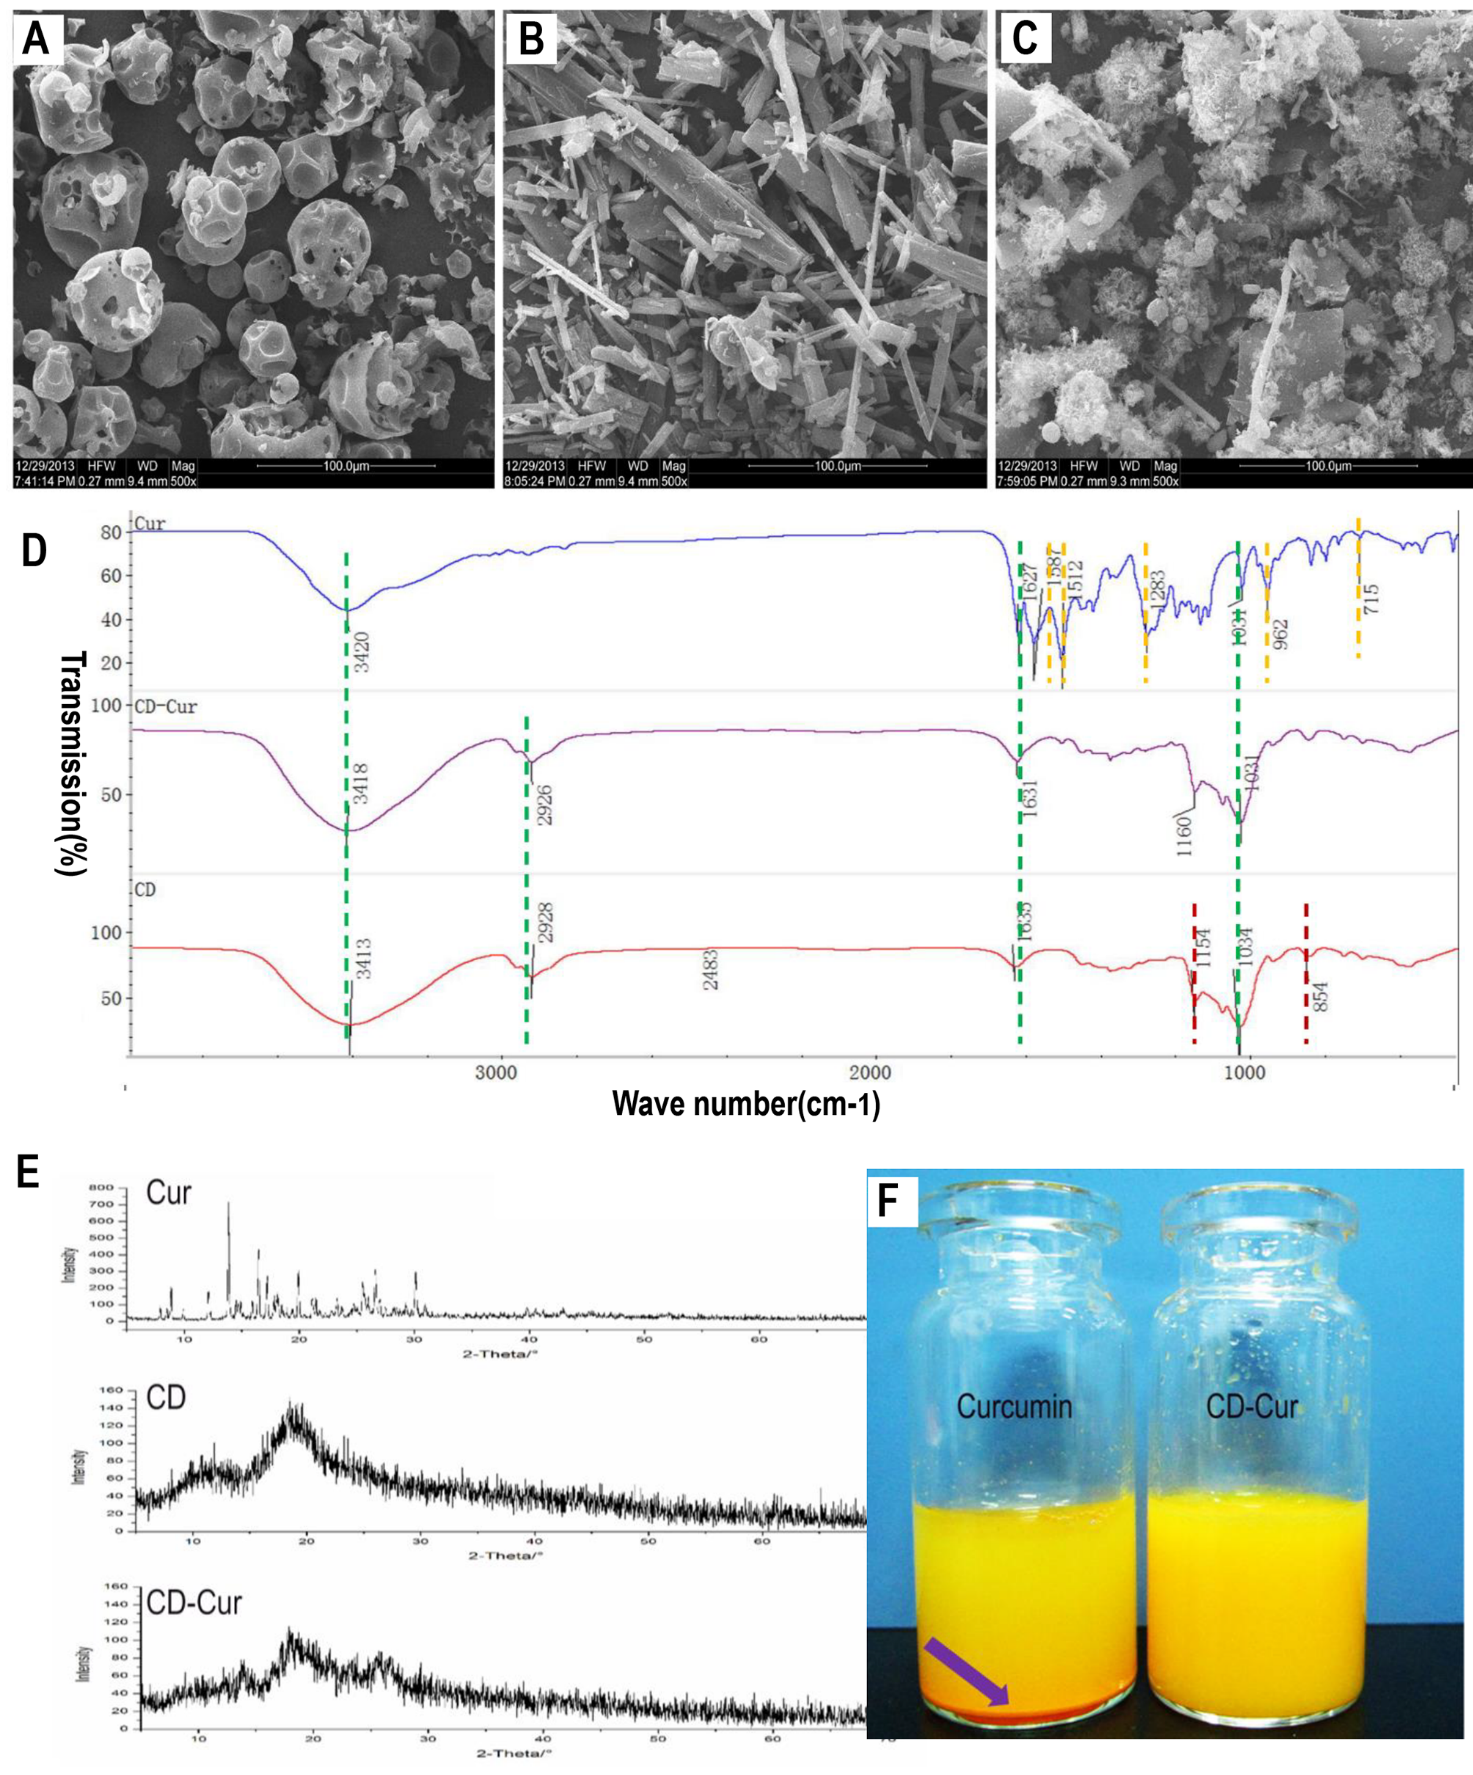


**Fig.S.1.** Characterization of CD-Cur. A-C: Scanning electron microscope (SEM) images of CD (A), Cur(B) and CD-Cur(C); D: FTIR spectra of Cur, CD and CD-Cur; E: X-ray diffraction patterns of Cur, CD and CD-Cur, respectively ; F: Photograph of Cur and CD-Cur dissolved in water.

**S.2.2. Optimal curcumin concentration determination for animal experiment**

This part of animal experiment was conducted for the determination of optimal curcumin concentration, which was adopted in the later experiment. Wound areas were measured and the healing rate was shown in Fig.S.3.A. On day 14, CA-CD-Cur 3(25mg of Cur) treated wounds exhibited fastest healing(93.54±4.62% on day 14) compared to CA-CD-Cur 1 (78.87±6.37%, P<0.001,one-way ANOVA;), CA-CD-Cur 2 (83.21±8.05%, P<0.05;) CA-CD-Cur4 (80.40±9.01,P< 0.05;), CA-CD-Cur 5(50.64±6.23 on day 14,P< 0.001;), and gauze groups (64.54±7.84, P< 0.05;).

Apart from superior wound closure rate, CA-CD-Cur 3 treated wounds showed healthy granulation tissue which was light pink and granular in appearance. In contrast, CA-CD-Cur 4 and CA-CD-Cur 5 treated wound exhibited varying degrees of edema and necrosis as shown in Fig.S.2. Probably because there were too much Cur accumulated in the wound site and highly concentrated application of polyphenols (Curcumin is a kind of polyphenols)might result in toxic response[3].


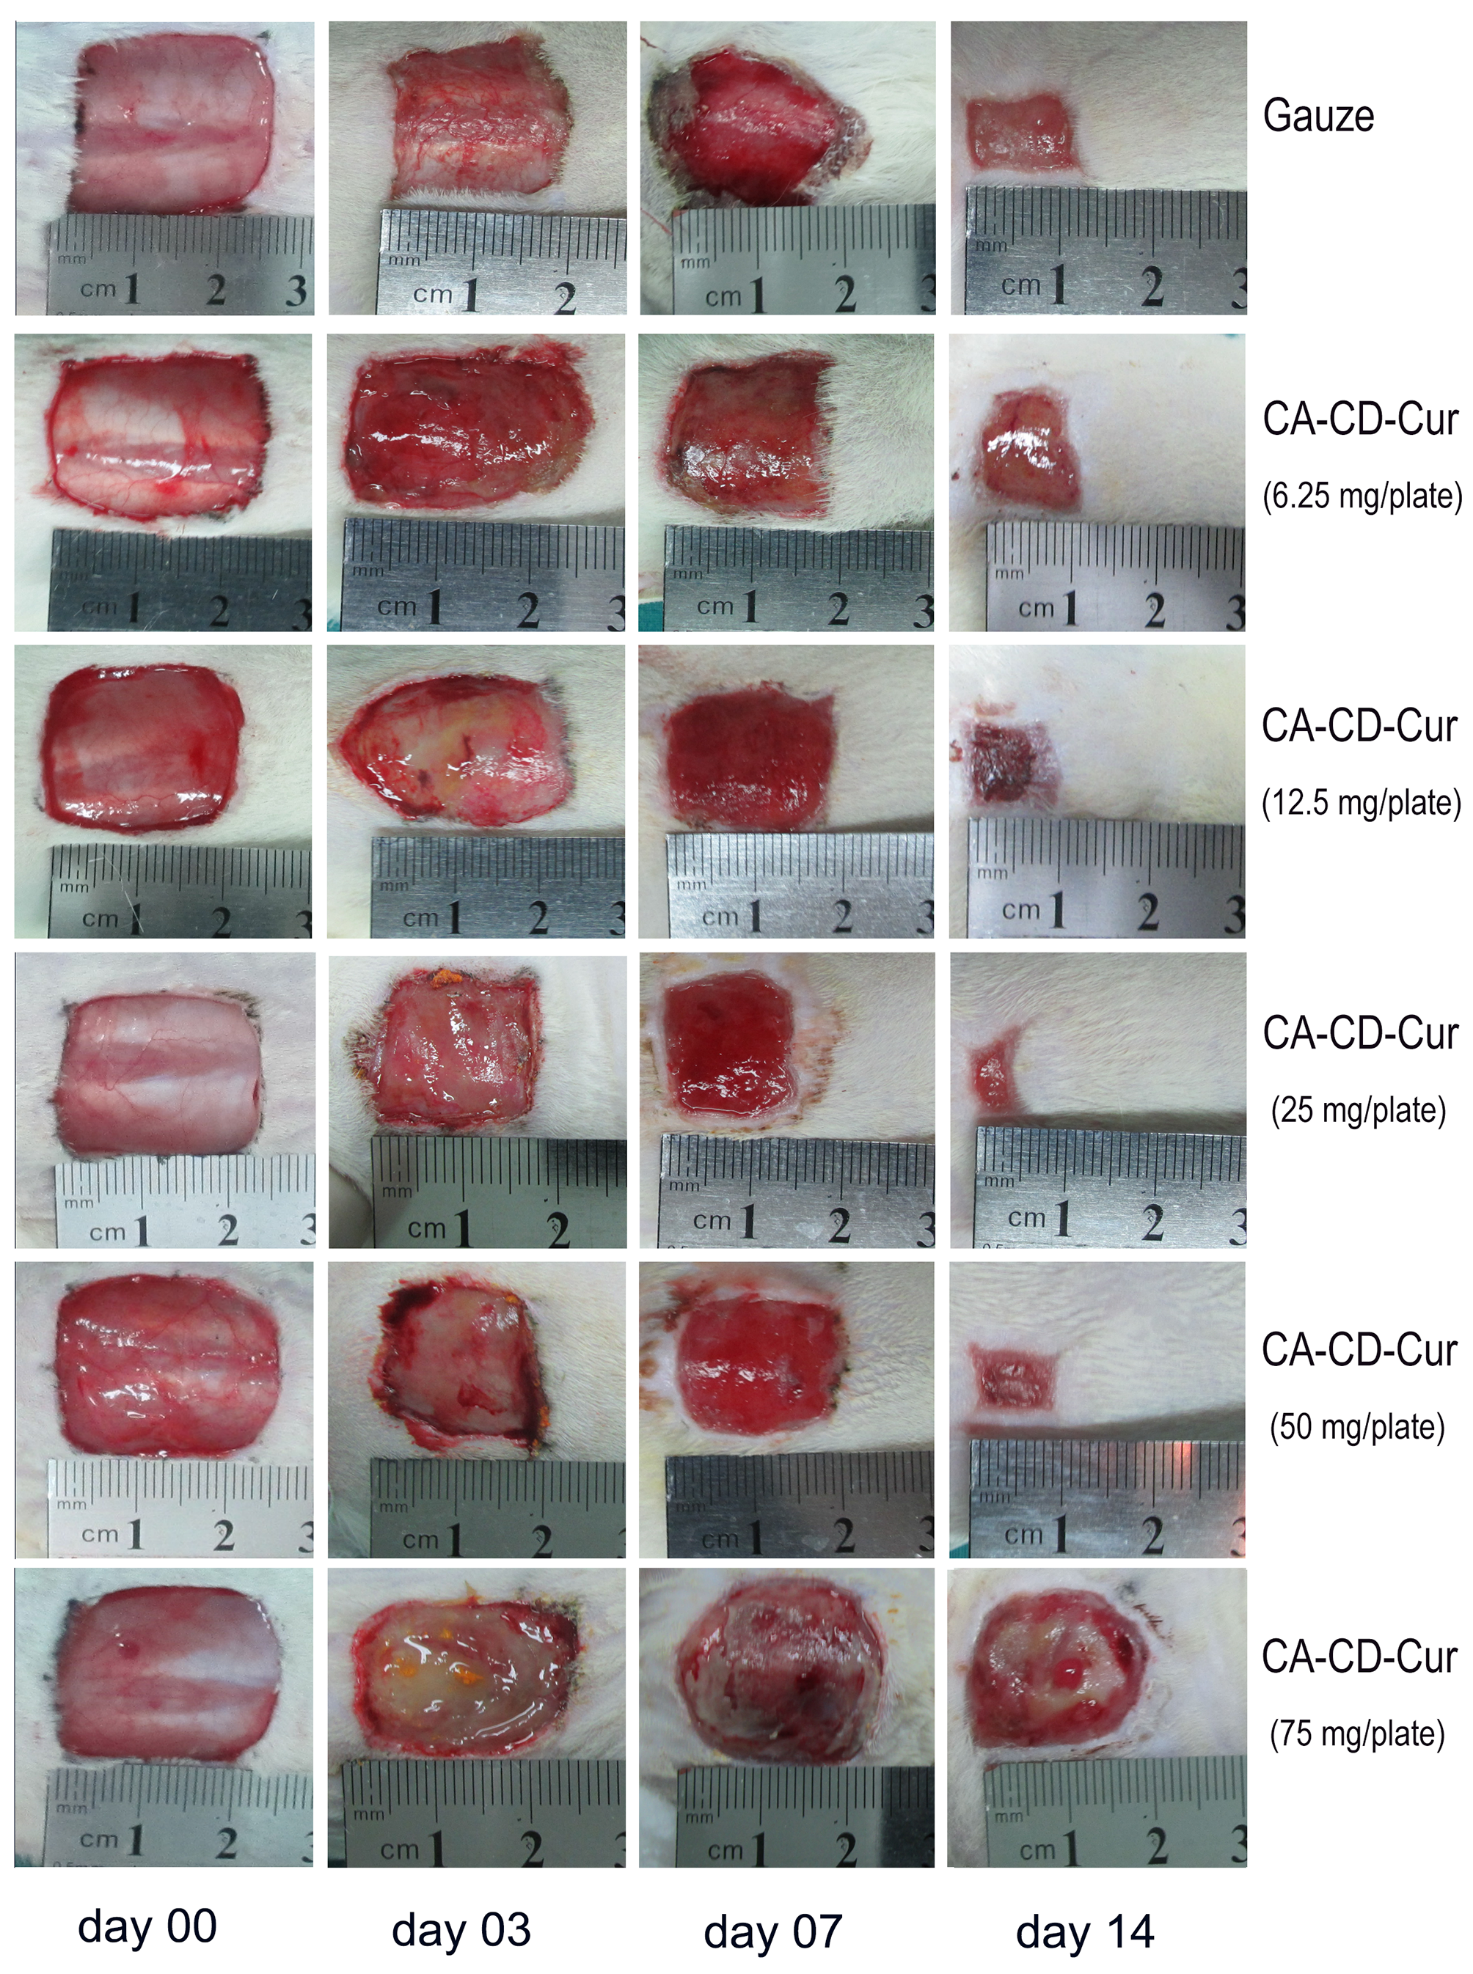


**Fig.S.2.** Macroscopic appearance of wounds treated with gauze (as control), CA-CD-Cur 1, CA-CD-Cur 2, CA-CD-Cur 3, CA-CD-Cur 4 and CA-CD-Cur 5 at 00th, 03th, 07th and 14th postwounding day.


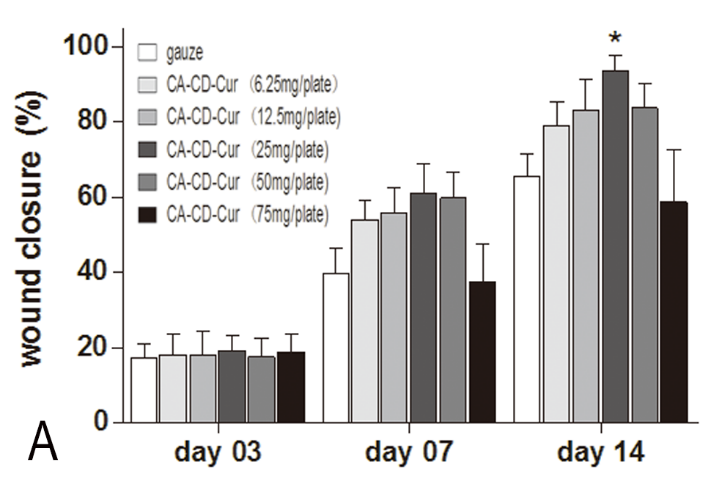


**Fig.S.3.** Wound closure rate of gauze (as control), CA-CD-Cur 1, CA-CD-Cur 2, CA-CD-Cur 3, CA-CD-Cur 4 and CA-CD-Cur 5 at different time point. Data were shown as Mean ± SD ( n = 6), *P < 0.05 (one-way ANOVA)

**References**

1. Mohan PRK, Sreelakshmi G, Muraleedharan CV, Joseph R: **Water soluble complexes of curcumin with cyclodextrins: Characterization by FT-Raman spectroscopy**. *Vibrational Spectroscopy* 2012, **62**(0):77-84.

2. Yallapu MM, Jaggi M, Chauhan SC: **beta-Cyclodextrin-curcumin self-assembly enhances curcumin delivery in prostate cancer cells**. *Colloids Surf B Biointerfaces* 2010, **79**(1):113-125.

3. Gong C, Wu Q, Wang Y, Zhang D, Luo F, Zhao X, Wei Y, Qian Z: **A biodegradable hydrogel system containing curcumin encapsulated in micelles for cutaneous wound healing**. *Biomaterials* 2013, **34**(27):6377-6387.
